# Supplementary material
Source: ML conference proceedings conference paper supplement (https://openaccess.thecvf.com/content/CVPR2023/html/Choi_Dynamic_Neural_Network_CVPR_2023_paper.html)
Supplement: Supplementary file 1 [file Choi_Dynamic_Neural_Network_CVPR_2023_supplemental.pdf]

Supplementary Document for  
**Dynamic Neural Network for Multi-Task Learning**  
**Searching across Diverse Network Topologies**

Wonhyeok Choi, Sunghoon Im\*  
 Department of Electrical Engineering & Computer Science, DGIST, Daegu, Korea  
 {smu06117, sunghoonim}@dgist.ac.kr

### 1. Implementation Details

**Central Network Architecture** We set the first 12 hidden states, the same as the VGG-16 [35], except for the max-pooled states as:

| State                     | Shape                |
|---------------------------|----------------------|
| $v_0$ (image state)       | B, 3, H, W           |
| $v_1$                     | B, 64, H, W          |
| $v_2$                     | B, 64, H, W          |
| $v_3$                     | B, 128, H//2, W//2   |
| $v_4$                     | B, 128, H//2, W//2   |
| $v_5$                     | B, 256, H//4, W//4   |
| $v_6$                     | B, 256, H//4, W//4   |
| $v_7$                     | B, 256, H//4, W//4   |
| $v_8$                     | B, 512, H//8, W//8   |
| $v_9$                     | B, 512, H//8, W//8   |
| $v_{10}$                  | B, 512, H//8, W//8   |
| $v_{11}$                  | B, 512, H//16, W//16 |
| $v_{12}$                  | B, 512, H//16, W//16 |
| $v_{13}$ (read-out state) | B, 512, H//16, W//16 |

Table 1. Shape of all hidden states

where shapes of states are represented as (batch size, number of channels, height, and width). Then, we link the states with edges as a block that consists of sequential operations as follows:

|                                                                                                                                               |
|-----------------------------------------------------------------------------------------------------------------------------------------------|
| $e_{ij} : v_i \rightarrow v_j$                                                                                                                |
| conv3x3( $C_{v_i}, C_{v_j}$ , padding = 1, stride = 1),<br>BatchNorm( $C_{v_j}$ ),<br>ReLU(),<br>Maxpool(kernel size = $H_{v_j} // H_{v_i}$ ) |

Table 2. The operation block of  $e_{ij}$

\*Corresponding author

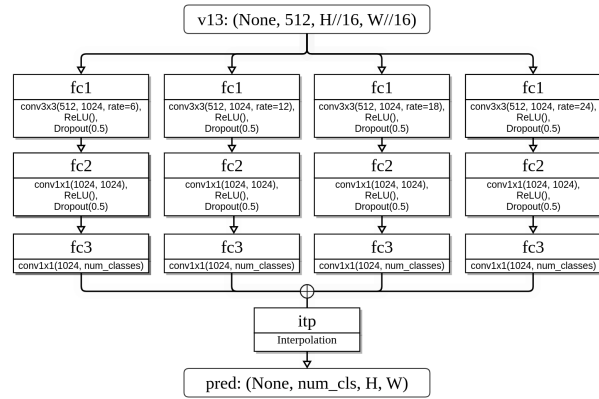

Figure 1. Task-specific head configuration

where  $C_{v_i}$  is the number of channels of  $v_i$ , and  $H_{v_i}$  is the height of  $v_i$ . We illustrate the overall structure of the central network with  $M = 3$  in Fig. 4. The read-in layer embeds the interpolated feature into all hidden states  $v_1, v_2, \dots, v_{12}$  with  $\alpha_i \in \mathcal{A}$ . Then, the network sequentially updates the hidden states with task-specific weight  $\gamma_{ij} \in \Gamma$  that corresponds to  $e_{ij}$ . Lastly, the read-out layer extracts the weighted sum of interpolated hidden states with  $\beta_i \in \mathcal{B}$ .

**Task-specific Head Architecture** For NYU-v2 [34], Cityscapes [7], and PASCAL-Context [26], we use the ASPP [5] architecture, a popular architecture for pixel-wise prediction tasks, as our task-specific heads.

**Training Details** The overall training process of our framework consists of 3 stages: warm-up, search, and fine-tuning. For Omniglot [17], we train the network 2,000, 3,000, and 5,000 iterations for warm-up, search, and fine-tuning stages, respectively. Similarly, for both NYU-v2 [34] and Cityscapes [7], we train the network 5,000, 15,000, and 20,000 iterations for warm-up, search, and fine-tuning stages, respectively. For PASCAL-Context [26], the network is trained for 10,000, 20,000, and 30,000 iterations for the warm-up, search, and fine-tuning stages, respectively.

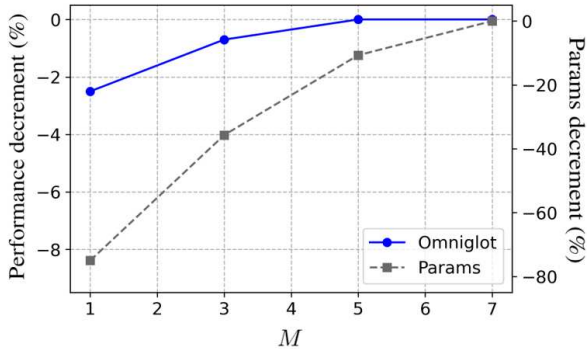

Figure 2. Model performance with respect to the proposed flow-restriction (Omniglot)

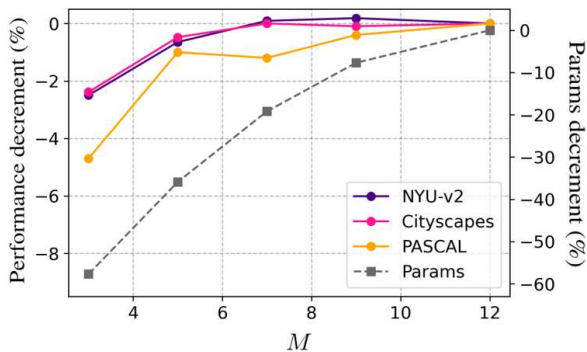

Figure 3. Model performance with respect to the proposed flow-restriction (NYU-v2, Cityscapes, PASCAL-Context)

We train all baselines [1, 11, 12, 20, 25, 29, 32, 38] with the same number of fine-tuning iterations for a fair comparison. Before the fine-tuning stage, we rewind the model parameters to the parameters at the end of the warm-up stage. We also report the learning rates of model weights parameters and upper-level parameters, and the balancing hyperparameter of squeeze loss  $\mathcal{L}_{sq}$  in the Tab. 3.

## 2. Full Results of All Metrics

In addition to the relative performance of all datasets (in the main paper), we report all the absolute task performance of NYU-v2, Cityscapes, and PASCAL-Context dataset with baseline in Tab. 5-7.

## 3. Trade-off Curves of All Datasets

Similar to Sec. 4.4 in the main paper, we analyze performance and computational complexity with respect to the flow constant  $M$  for all datasets. We plot the degradation ratio of the performance (left y-axis) and parameter (right

| Dataset             | weight lr | upper lr | $\lambda_{sq}$ |
|---------------------|-----------|----------|----------------|
| Omniglot [17]       | 0.0001    | 0.01     | 0.05           |
| NYU-v2 [34]         | 0.0001    | 0.01     | 0.05           |
| Cityscapes [7]      | 0.0001    | 0.05     | 0.01           |
| PASCAL-Context [26] | 0.0001    | 0.01     | 0.005          |

Table 3. **Hyperparameters for each dataset** We report the learning rates of model weights parameters (weight lr), and upper-level parameters (upper lr), and balancing weight  $\lambda_{sq}$  for squeeze loss  $\mathcal{L}_{sq}$ . **Our framework does not use task-balancing parameters.**

y-axis) by changing the flow constant  $M$  in Fig. 2-3. The final task performance degradation of each dataset, including Omniglot, NYU-v2, Cityscapes, and PASCAL-Context, is marked by blue, purple, pink, and orange, respectively. Additionally, the number of parameters of search space for Omniglot, and other datasets are marked by a gray dashed line.

## 4. Ablation Studies

### 4.1. Three-stage learning scheme

We follow the learning scheme as traditional Nas-style MTL three-stage learning. To show that the three-stage learning scheme boosts the overall performance on multi-task learning scenarios, we report the relative task performance of each stage in Tab. 4.

| Method ( $M = 5$ ) | $\Delta\mathcal{T}_{sem} \uparrow$ | $\Delta\mathcal{T}_{dep} \uparrow$ | $\Delta\mathcal{T}_{norm} \uparrow$ | $\Delta\mathcal{T} \uparrow$ | # of Param $\downarrow$ |
|--------------------|------------------------------------|------------------------------------|-------------------------------------|------------------------------|-------------------------|
| with three-stages  | <b>0.0</b>                         | <b>0.0</b>                         | <b>0.0</b>                          | <b>0.0</b>                   | <b>1.04</b>             |
| w/o warm-up        | -7.4                               | -3.7                               | -3.0                                | -4.3                         | <b>1.04</b>             |
| w/o search + FBR   | -14.8                              | -0.1                               | -3.3                                | -6.1                         | 6.50                    |
| w/o fine-tune      | -13.6                              | -9.7                               | -3.3                                | -8.9                         | <b>1.04</b>             |

Table 4. Ablation studies of three-stages on NYU-v2 dataset

### 4.2. Ablation studies on key components

Lastly, we provide the absolute task performance of all metrics for ablation studies of four key components; flow restriction, read-in/out layers, flow-based reduction, and squeeze loss in Tab. 8.

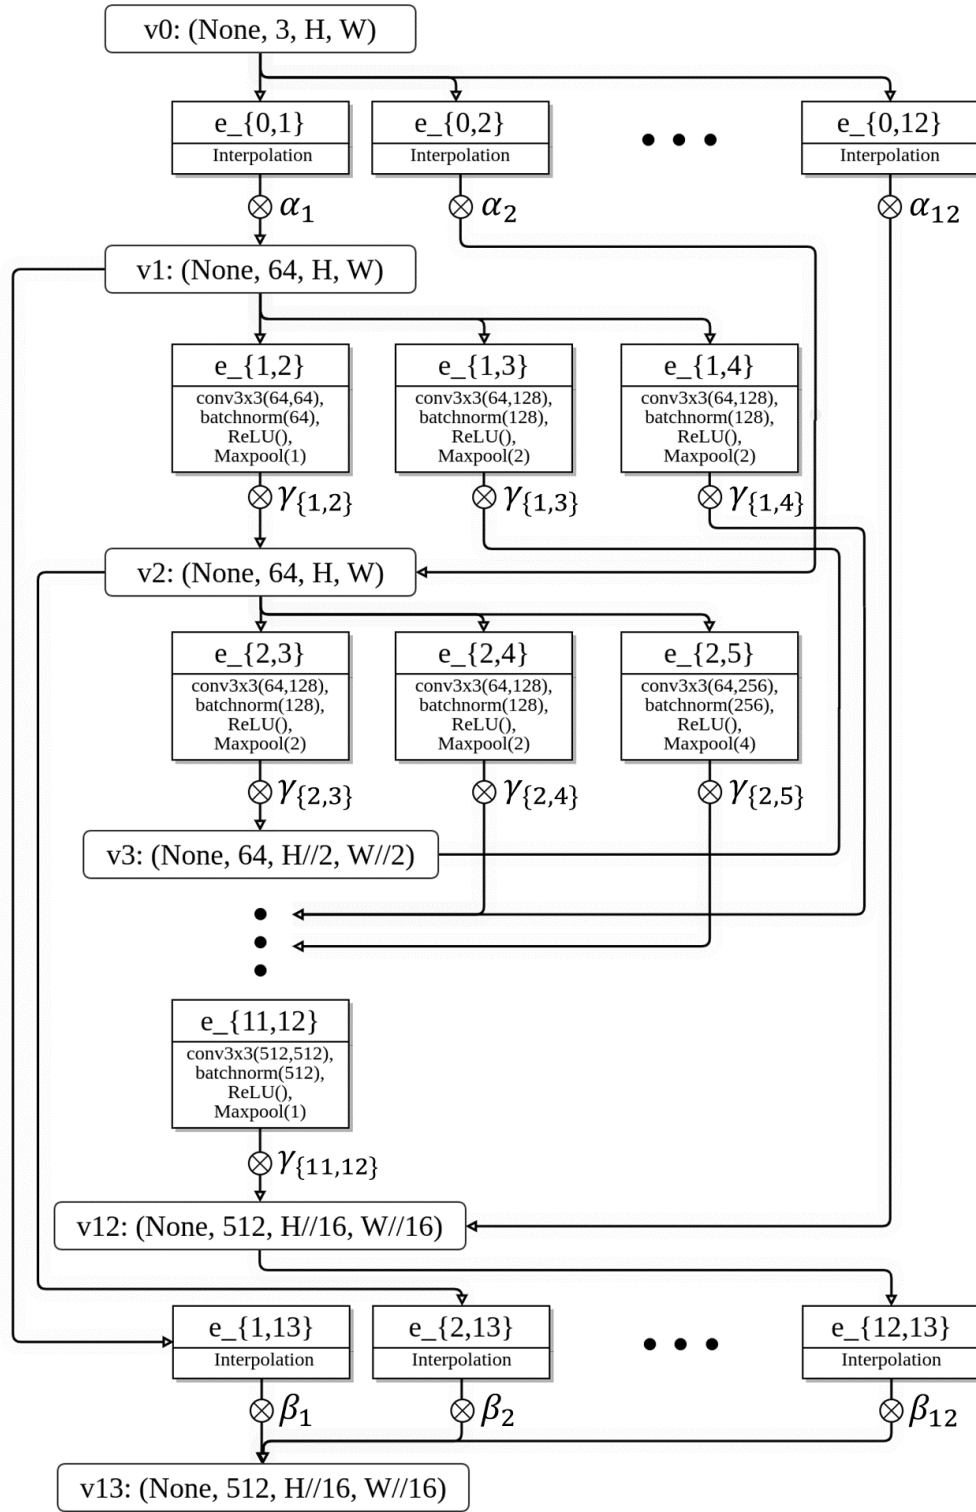

Figure 4. Central network configuration

| Method           | # Params ↓ | Semantic Seg. |             | Depth Prediction |             |                     |                   |                   | Surface Normal Prediction |             |                     |             |             |
|------------------|------------|---------------|-------------|------------------|-------------|---------------------|-------------------|-------------------|---------------------------|-------------|---------------------|-------------|-------------|
|                  |            | mIoU ↑        | Pixel Acc ↑ | Error ↓          |             | $\theta$ , within ↑ |                   |                   | Error ↓                   |             | $\delta$ , within ↑ |             |             |
|                  |            |               |             | Abs              | Rel         | 1.25                | 1.25 <sup>2</sup> | 1.25 <sup>3</sup> | Mean                      | Median      | 11.25°              | 22.5°       | 30°         |
| Single-Task      | 3          | 27.5          | 58.9        | 0.62             | 0.25        | 57.9                | 85.8              | 95.7              | 17.5                      | 15.2        | 34.9                | 73.3        | 85.7        |
| Shared Bottom    | <b>1</b>   | 24.1          | 57.2        | 0.58             | 0.23        | 62.4                | 88.2              | 96.5              | 16.6                      | 13.4        | 42.5                | 73.2        | 84.6        |
| Cross-Stitch     | 3          | 25.4          | 57.6        | 0.58             | 0.23        | 61.4                | 88.4              | 95.5              | 17.2                      | 14.0        | 41.4                | 70.5        | 82.9        |
| Sluice           | 3          | 23.8          | 56.9        | 0.58             | 0.24        | 61.9                | 88.1              | 96.3              | 17.2                      | 14.4        | 38.9                | 71.8        | 83.9        |
| NDDR-CNN         | 3.15       | 21.6          | 53.9        | 0.66             | 0.26        | 55.7                | 83.7              | 94.8              | 17.1                      | 14.5        | 37.4                | 73.7        | 85.6        |
| MTAN             | 3.11       | 26.0          | 57.2        | 0.57             | 0.25        | 62.7                | 87.7              | 95.9              | 16.6                      | 13.0        | 43.7                | 73.3        | 84.4        |
| DEN              | 1.12       | 23.9          | 54.9        | 0.97             | 0.31        | 22.8                | 62.4              | 88.2              | 17.1                      | 14.8        | 36.0                | 73.4        | 85.9        |
| AdaShare         | <b>1</b>   | 30.2          | 62.4        | 0.55             | <b>0.20</b> | 64.5                | 90.5              | 97.8              | 16.6                      | <b>12.9</b> | <b>45.0</b>         | 71.7        | 83.0        |
| Ours ( $M = 5$ ) | 1.04       | 31.8          | 63.7        | 0.56             | 0.21        | 64.3                | 90.2              | 97.7              | 16.5                      | 13.2        | 43.9                | 71.7        | 82.9        |
| Ours ( $M = 7$ ) | 1.31       | <b>32.3</b>   | 64.3        | <b>0.54</b>      | <b>0.20</b> | <b>64.7</b>         | 90.5              | 98.1              | <b>16.4</b>               | <b>12.9</b> | 43.1                | <b>73.8</b> | <b>86.1</b> |
| Ours ( $M = 9$ ) | 1.63       | 32.1          | <b>64.6</b> | <b>0.54</b>      | <b>0.20</b> | <b>64.7</b>         | <b>91.1</b>       | <b>99.1</b>       | <b>16.4</b>               | 13.1        | 43.4                | <b>73.8</b> | 86.0        |

Table 5. NYU v2 full results

| Model             | # Params ↓  | Semantic Seg. |             | Depth Prediction |             |                     |                   |                   |
|-------------------|-------------|---------------|-------------|------------------|-------------|---------------------|-------------------|-------------------|
|                   |             | mIoU ↑        | Pixel Acc ↑ | Error ↓          |             | $\delta$ , within ↑ |                   |                   |
|                   |             |               |             | Abs              | Rel         | 1.25                | 1.25 <sup>2</sup> | 1.25 <sup>3</sup> |
| Single-Task       | 2           | 40.2          | 74.7        | 0.017            | 0.33        | 70.3                | 86.3              | 93.3              |
| Shared Bottom     | 1           | 37.7          | 73.8        | 0.018            | 0.34        | 72.4                | 88.3              | 94.2              |
| Cross-Stitch [25] | 2           | 40.3          | 74.3        | <b>0.015</b>     | <b>0.30</b> | 74.2                | 89.3              | 94.9              |
| Sluice [32]       | 2           | 39.8          | 74.2        | 0.016            | 0.31        | 73.0                | 88.8              | 94.6              |
| NDDR-CNN [11]     | 2.07        | 41.5          | 74.2        | 0.017            | 0.31        | 74.0                | 89.3              | 94.8              |
| MTAN [20]         | 2.41        | 40.8          | 74.3        | <b>0.015</b>     | 0.32        | 75.1                | 89.3              | 94.6              |
| DEN [1]           | 1.12        | 38.0          | 74.2        | 0.017            | 0.37        | 72.3                | 87.1              | 93.4              |
| AdaShare [38]     | 1           | 41.5          | 74.9        | 0.016            | 0.33        | <b>75.5</b>         | 89.8              | 94.9              |
| Ours ( $M = 5$ )  | <b>0.96</b> | 42.8          | 75.1        | 0.016            | 0.32        | 74.8                | 89.1              | 94.2              |
| Ours ( $M = 7$ )  | 1.16        | 46.4          | <b>75.6</b> | 0.016            | 0.33        | 74.0                | 89.3              | 94.0              |
| Ours ( $M = 9$ )  | 1.31        | <b>46.5</b>   | 75.4        | 0.016            | 0.32        | 75.4                | <b>90.4</b>       | <b>96.1</b>       |

Table 6. Cityscapes full results

| Method            | # Params ↓ | Semantic Seg. | Part Seg.   | Saliency    | Surface Normal | Edge         |
|-------------------|------------|---------------|-------------|-------------|----------------|--------------|
|                   |            | mIoU ↑        | mIoU ↑      | mIoU ↑      | Mean ↓         | Mean ↓       |
| Single-Task       | 5          | <b>63.9</b>   | 57.6        | 65.2        | 14.0           | <b>0.018</b> |
| Shared Bottom     | <b>1</b>   | 59.7          | 57.2        | 63.0        | 16.0           | <b>0.018</b> |
| Cross-Stitch [25] | 5          | 63.1          | 59.7        | 65.1        | 14.2           | <b>0.018</b> |
| Sluice [32]       | 5          | 62.9          | 56.9        | 64.9        | 14.4           | 0.019        |
| NDDR-CNN [11]     | 5.61       | 63.2          | 56.1        | 65.2        | 14.7           | <b>0.018</b> |
| MTAN [20]         | 5.21       | 61.6          | 57.2        | 65.0        | 14.7           | 0.019        |
| AdaShare [38]     | <b>1</b>   | 63.1          | <b>59.9</b> | 64.9        | 14.1           | <b>0.018</b> |
| LTB [12]          | 3.19       | 59.5          | 56.5        | 65.3        | 14.2           | <b>0.018</b> |
| PHN [29]          | 2.51       | 59.7          | 56.7        | 64.6        | 14.0           | <b>0.018</b> |
| Ours ( $M = 5$ )  | 1.93       | 63.7          | 59.6        | 65.8        | 14.0           | <b>0.018</b> |
| Ours ( $M = 7$ )  | 1.91       | <b>63.9</b>   | 57.5        | 66.3        | <b>13.8</b>    | <b>0.018</b> |
| Ours ( $M = 9$ )  | 2.31       | <b>63.9</b>   | 59.7        | <b>66.4</b> | <b>13.8</b>    | <b>0.018</b> |

Table 7. PASCAL-Context full results

| Method                   | Semantic Seg. |             | Depth Prediction |             |                     |                   |                   | Surface Normal Prediction |             |                     |             |             |
|--------------------------|---------------|-------------|------------------|-------------|---------------------|-------------------|-------------------|---------------------------|-------------|---------------------|-------------|-------------|
|                          | mIoU ↑        | Pixel Acc ↑ | Error ↓          |             | $\theta$ , within ↑ |                   |                   | Error ↓                   |             | $\delta$ , within ↑ |             |             |
|                          |               |             | Abs              | Rel         | 1.25                | 1.25 <sup>2</sup> | 1.25 <sup>3</sup> | Mean                      | Median      | 11.25°              | 22.5°       | 30°         |
| Ours ( $M = 7$ )         | 32.3          | 64.3        | 0.54             | <b>0.20</b> | 64.7                | 90.5              | 98.1              | <b>16.4</b>               | <b>12.9</b> | <b>43.1</b>         | <b>73.8</b> | 86.1        |
| w/o flow-restriction     | 32.1          | 64.6        | 0.54             | <b>0.20</b> | 64.2                | <b>90.7</b>       | 98.1              | 16.5                      | <b>12.9</b> | 42.9                | 73.7        | <b>87.2</b> |
| w/o read-in/out          | 31.3          | 64.5        | 0.54             | <b>0.20</b> | 64.5                | 90.3              | 98.0              | 16.6                      | 13.0        | 42.5                | 73.0        | 86.3        |
| w/o flow-based reduction | <b>32.5</b>   | <b>64.9</b> | <b>0.53</b>      | <b>0.20</b> | <b>64.8</b>         | <b>90.7</b>       | <b>98.3</b>       | <b>16.4</b>               | <b>12.9</b> | <b>43.1</b>         | <b>73.8</b> | 86.3        |
| w/o $\mathcal{L}_{sq}$   | 32.1          | 64.6        | 0.54             | <b>0.20</b> | 64.7                | 90.5              | 98.1              | 16.5                      | 13.0        | 42.5                | 73.6        | 87.0        |

Table 8. Ablation Studies in NYU-v2

## References

- [1] Chanho Ahn, Eunwoo Kim, and Songhwai Oh. Deep elastic networks with model selection for multi-task learning. In *Proceedings of the IEEE/CVF international conference on computer vision*, pages 6529–6538, 2019. [2](#), [4](#)
- [2] Bowen Baker, Otkrist Gupta, Nikhil Naik, and Ramesh Raskar. Designing neural network architectures using reinforcement learning. *arXiv preprint arXiv:1611.02167*, 2016.
- [3] Hakan Bilen and Andrea Vedaldi. Integrated perception with recurrent multi-task neural networks. *Advances in neural information processing systems*, 29, 2016.
- [4] Han Cai, Ligeng Zhu, and Song Han. Proxylessnas: Direct neural architecture search on target task and hardware. *arXiv preprint arXiv:1812.00332*, 2018.
- [5] Liang-Chieh Chen, George Papandreou, Iasonas Kokkinos, Kevin Murphy, and Alan L Yuille. Deeplab: Semantic image segmentation with deep convolutional nets, atrous convolution, and fully connected crfs. *IEEE transactions on pattern analysis and machine intelligence*, 40(4):834–848, 2017. [1](#)
- [6] Ying Chen, Jiong Yu, Yutong Zhao, Jiaying Chen, and Xusheng Du. Task’s choice: Pruning-based feature sharing (pbfs) for multi-task learning. *Entropy*, 24(3):432, 2022.
- [7] Marius Cordts, Mohamed Omran, Sebastian Ramos, Timo Rehfeld, Markus Enzweiler, Rodrigo Benenson, Uwe Franke, Stefan Roth, and Bernt Schiele. The cityscapes dataset for semantic urban scene understanding. In *Proc. of the IEEE Conference on Computer Vision and Pattern Recognition (CVPR)*, 2016. [1](#), [2](#)
- [8] Thomas Elsken, Jan Hendrik Metzen, and Frank Hutter. Neural architecture search: A survey. *The Journal of Machine Learning Research*, 20(1):1997–2017, 2019.
- [9] Chrisantha Fernando, Dylan Banarse, Charles Blundell, Yori Zwols, David Ha, Andrei A Rusu, Alexander Pritzel, and Daan Wierstra. Pathnet: Evolution channels gradient descent in super neural networks. *arXiv preprint arXiv:1701.08734*, 2017.
- [10] Yuan Gao, Haoping Bai, Zequn Jie, Jiayi Ma, Kui Jia, and Wei Liu. Mtl-nas: Task-agnostic neural architecture search towards general-purpose multi-task learning. In *Proceedings of the IEEE/CVF Conference on computer vision and pattern recognition*, pages 11543–11552, 2020.
- [11] Yuan Gao, Jiayi Ma, Mingbo Zhao, Wei Liu, and Alan L Yuille. Nddr-cnn: Layerwise feature fusing in multi-task cnns by neural discriminative dimensionality reduction. In *Proceedings of the IEEE/CVF conference on computer vision and pattern recognition*, pages 3205–3214, 2019. [2](#), [4](#)
- [12] Pengsheng Guo, Chen-Yu Lee, and Daniel Ulbricht. Learning to branch for multi-task learning. In *International Conference on Machine Learning*, pages 3854–3863. PMLR, 2020. [2](#), [4](#)
- [13] Junshi Huang, Rogerio S Feris, Qiang Chen, and Shuicheng Yan. Cross-domain image retrieval with a dual attribute-aware ranking network. In *Proceedings of the IEEE international conference on computer vision*, pages 1062–1070, 2015.
- [14] Brendan Jou and Shih-Fu Chang. Deep cross residual learning for multitask visual recognition. In *Proceedings of the 24th ACM international conference on Multimedia*, pages 998–1007, 2016.
- [15] Zhuoliang Kang, Kristen Grauman, and Fei Sha. Learning with whom to share in multi-task feature learning. In *ICML*, 2011.
- [16] Diederik P Kingma and Jimmy Ba. Adam: A method for stochastic optimization. *arXiv preprint arXiv:1412.6980*, 2014.
- [17] Brenden M Lake, Ruslan Salakhutdinov, and Joshua B Tenenbaum. Human-level concept learning through probabilistic program induction. *Science*, 350(6266):1332–1338, 2015. [1](#), [2](#)
- [18] Jason Liang, Elliot Meyerson, and Risto Miikkulainen. Evolutionary architecture search for deep multitask networks. In *Proceedings of the Genetic and Evolutionary Computation Conference*, pages 466–473, 2018.
- [19] Hanxiao Liu, Karen Simonyan, and Yiming Yang. Darts: Differentiable architecture search. *arXiv preprint arXiv:1806.09055*, 2018.
- [20] Shikun Liu, Edward Johns, and Andrew J Davison. End-to-end multi-task learning with attention. In *Proceedings of the IEEE/CVF conference on computer vision and pattern recognition*, pages 1871–1880, 2019. [2](#), [4](#)
- [21] Jiaqi Ma, Zhe Zhao, Jilin Chen, Ang Li, Lichan Hong, and Ed H Chi. Snr: Sub-network routing for flexible parameter sharing in multi-task learning. In *Proceedings of the AAAI Conference on Artificial Intelligence*, volume 33, pages 216–223, 2019.
- [22] Krzysztof Maziarz, Efi Kokiopoulou, Andrea Gesmundo, Luciano Sbaiz, Gabor Bartok, and Jesse Berent. Flexible multi-task networks by learning parameter allocation. *arXiv preprint arXiv:1910.04915*, 2019.
- [23] Elliot Meyerson and Risto Miikkulainen. Beyond shared hierarchies: Deep multitask learning through soft layer ordering. *arXiv preprint arXiv:1711.00108*, 2017.
- [24] Risto Miikkulainen, Jason Liang, Elliot Meyerson, Aditya Rawal, Daniel Fink, Olivier Francon, Bala Raju, Hormoz Shahrzad, Arshak Navruzyan, Nigel Duffy, et al. Evolving deep neural networks. In *Artificial intelligence in the age of neural networks and brain computing*, pages 293–312. Elsevier, 2019.
- [25] Ishan Misra, Abhinav Shrivastava, Abhinav Gupta, and Martial Hebert. Cross-stitch networks for multi-task learning. In *Proceedings of the IEEE conference on computer vision and pattern recognition*, pages 3994–4003, 2016. [2](#), [4](#)
- [26] Roozbeh Mottaghi, Xianjie Chen, Xiaobai Liu, Nam-Gyu Cho, Seong-Whan Lee, Sanja Fidler, Raquel Urtasun, and Alan Yuille. The role of context for object detection and semantic segmentation in the wild. In *Proceedings of the IEEE conference on computer vision and pattern recognition*, pages 891–898, 2014. [1](#), [2](#)
- [27] Hieu Pham, Melody Guan, Barret Zoph, Quoc Le, and Jeff Dean. Efficient neural architecture search via parameters sharing. In *International conference on machine learning*, pages 4095–4104. PMLR, 2018.
- [28] Prajit Ramachandran and Quoc V Le. Diversity and depth in per-example routing models. In *International Conference on Learning Representations*, 2018.

- [29] Dripta S Raychaudhuri, Yumin Suh, Samuel Schuler, Xiang Yu, Masoud Faraki, Amit K Roy-Chowdhury, and Manmohan Chandraker. Controllable dynamic multi-task architectures. In *Proceedings of the IEEE/CVF Conference on Computer Vision and Pattern Recognition*, pages 10955–10964, 2022. [2](#), [4](#)
- [30] Esteban Real, Sherry Moore, Andrew Selle, Saurabh Saxena, Yutaka Leon Suematsu, Jie Tan, Quoc V Le, and Alexey Kurakin. Large-scale evolution of image classifiers. In *International Conference on Machine Learning*, pages 2902–2911. PMLR, 2017.
- [31] Sebastian Ruder. An overview of multi-task learning in deep neural networks. *arXiv preprint arXiv:1706.05098*, 2017.
- [32] Sebastian Ruder, Joachim Bingel, Isabelle Augenstein, and Anders Søgaard. Sluice networks: Learning what to share between loosely related tasks. *arXiv preprint arXiv:1705.08142*, 2, 2017. [2](#), [4](#)
- [33] Noam Shazeer, Azalia Mirhoseini, Krzysztof Maziarz, Andy Davis, Quoc Le, Geoffrey Hinton, and Jeff Dean. Outrageously large neural networks: The sparsely-gated mixture-of-experts layer. *arXiv preprint arXiv:1701.06538*, 2017.
- [34] Nathan Silberman, Derek Hoiem, Pushmeet Kohli, and Rob Fergus. Indoor segmentation and support inference from rgb-d images. In *European conference on computer vision*, pages 746–760. Springer, 2012. [1](#), [2](#)
- [35] Karen Simonyan and Andrew Zisserman. Very deep convolutional networks for large-scale image recognition. *arXiv preprint arXiv:1409.1556*, 2014. [1](#)
- [36] Trevor Standley, Amir Zamir, Dawn Chen, Leonidas Guibas, Jitendra Malik, and Silvio Savarese. Which tasks should be learned together in multi-task learning? In *International Conference on Machine Learning*, pages 9120–9132. PMLR, 2020.
- [37] Masanori Suganuma, Shinichi Shirakawa, and Tomoharu Nagao. A genetic programming approach to designing convolutional neural network architectures. In *Proceedings of the genetic and evolutionary computation conference*, pages 497–504, 2017.
- [38] Ximeng Sun, Rameswar Panda, Rogerio Feris, and Kate Saenko. Adashare: Learning what to share for efficient deep multi-task learning. *Advances in Neural Information Processing Systems*, 33:8728–8740, 2020. [2](#), [4](#)
- [39] Sirui Xie, Hehui Zheng, Chunxiao Liu, and Liang Lin. Snas: stochastic neural architecture search. *arXiv preprint arXiv:1812.09926*, 2018.
- [40] Barret Zoph and Quoc V Le. Neural architecture search with reinforcement learning. *arXiv preprint arXiv:1611.01578*, 2016.
- [41] Barret Zoph, Vijay Vasudevan, Jonathon Shlens, and Quoc V Le. Learning transferable architectures for scalable image recognition. In *Proceedings of the IEEE conference on computer vision and pattern recognition*, pages 8697–8710, 2018.
